# Supplementary material for: Barriers and Facilitators to Effective Kangaroo Mother Care in Ethiopia: A Qualitative Study
Source: Research Square preprint supplement (doi:10.21203/rs.3.rs-7685786/v1), 2025-11-01
Supplement: Supplementary file 1 [file 0dd8d9298ec860d20181c15f.docx]

***Supplementary File 1***

## **Questionnaires of In-depth interview for a research project to explore enablers and barriers to effective Kangaroo Mother Care among mothers and HCPs at the NICU/KMC (English version)**

***A. Informed information sheet for mothers attending KMC***

GREETING!

My name is _____, I am working in _______, and now I am collecting data from you for the research being conducted to explore enablers and barriers of practicing effective KMC. We would like to improve the effective KMC service being provided in health institutions in the future. We hoped that the discussion with you would be very helpful to strengthen the service and promote the general wellbeing of both the mother and children. Hence, I would like to raise some questions for discussion about the general enablers and barriers of KMC. Before the beginning of the discussion, I wish to express my appreciation for your voluntary participation. Based on the purpose and objectives of the study, I am collecting data from you for the research being conducted to explore enablers and barriers of practicing effective KMC. I would like to ask you a set of specific questions. I will be grateful if you can spend some time talking with me. The interview is consent-based, voluntary, confidential, private, and of approximately half an hour duration. Other than a general serial code, your name and other identification aspects are not going to be recorded on the interview sheet. Everything you are going to say will be kept strictly confidential and private. You will not be obliged to respond to one or more of the specific questions that you do not want to answer. However, as long as you find it reasonably convincing, it will undoubtedly be more useful when all of the questions in the interview set are answered.

**Person to contact:** This research project has been reviewed and approved by the institutional review board of the College of Health Science, department of reproductive family and population health. If you have any questions, you can contact any of the following individuals (Investigator and Advisor), and you may ask at any time what you want:

- 1. Beyene Roba (BSC), Addis Ababa University, College of Health Science, Department of Reproductive Family and Population Health: **Principal Investigator**

Cell phone: +251942450505

E-mail: [beyene.roba@aau.edu.et](mailto:beyene.roba@aau.edu.et)

- 1. Abiy Seifu (MPH, Assistant Professor), Addis Ababa University, College of Health Science, Department of Reproductive Family and Population Health: **Main Advisor**

Cell phone: +251118430038

E-mail: [abiy.seifu@aau.edu.et](mailto:abiy.seifu@aau.edu.et)

***B. Consent and contact for KMC mothers.***

I have read or been read this form in a language I understand, and I understand all of the conditions stated above.

There for 1. I agree to participate 2. I do not agree to participate.

Signature ------------------------------------- Date -----------------------------------------------

**Tool I: In-depth interview with mothers of Low birth weight/preterm infants-KMC**

| **#** | **Item** | **Response options/ Codes** |
| --- | --- | --- |
|  | **Identifiers** |  |
| 1 | Participant ID |  |
| 2 | Interview date |  |
| 3 | Language of Interview |  |
| 4 | Zone |  |
| 5 | Woreda |  |
| 6 | Health facility name |  |
|  | **Background information** |  |
| 7 | What is your age in completed years? |  |
| 8 | What is your marital status? | 1. Single  2. Married/living together  3. Widowed  4. Separated  5. Other (specify) |
| 9 | Religion of the respondent? | A. Orthodox  B. Catholic  C. Protestant  D. Muslim  E. Traditional  F. No religion  G. Other (specify)……... |
| 10 | Where do you live? (Residency) | A. Urban  B. Rural |
| 11 | What is your occupation? |  |
| 12 | How many children do you have? |  |
| 13 | What is the highest school grade you completed? |  |
| 14 | Can you read? | 1. Yes  2. No |
| 15 | Can you write? | 1. Yes  2. No |

**Build rapport:**

- To begin, I’d like to get to know you a little bit more. Tell me, what is it like for you being a mother?
  - Tell me about your family.

**Now I would like to talk about early KMC (skin-to-skin contact combined with exclusive breastfeeding) in the first 24 hours after birth)**

**Effective KMC:**

- Where did you give birth to your child? Why there/here?
  - Health center, another hospital, in this hospital…
    1. If you didn't give birth at this hospital, why and how did you and your baby come to be brought to this hospital?
       1. What were the transport mechanisms and how long did it take for you to reach here?
       2. Was skin-to-skin contact care initiated before the referral? If yes, how? If not, why not?
- When do you think a mother should begin skin-to-skin contact care for her baby after giving birth? Why?
- When were you admitted to this room [KMC room] after giving birth?
  - What factors contributed to the delay in admitting to this room [>24 hours after birth]?
    1. Were there any infant factors, medical factors, or maternal factors/medical conditions that influenced this decision?
  - Were you brought to this room together with your baby? If yes, why? If not, why not?
    1. If you were brought to the KMC room after your baby, who provided skin-to-skin contact care for the baby? Why was that family member selected, and how did they assist you in giving skin-to-skin contact care? What about other family member support?
- Were you informed about the reason for your admission to this room [KMC room]? If yes, could you please share who informed you and what you were told? If not, could you explain why you were not informed about the reason for your admission?
- What factors hinder you from admitting to this room [KMC room] and start Kangaroo Mother Care (KMC) early within 24 hours after you gave birth at this hospital?
  - Medical factors (gestational age, birth weight, baby's health)
  - Maternal factors (health, willingness, readiness, postpartum health)
  - Healthcare system support (setting, resource constraints, …
  - Knowledge and education (awareness and counseling)
  - Psychological factors (stress, empowerment, encouragement)
  - Acceptance and beliefs (cultural, religious, alignment with beliefs and values)
  - Healthcare provider attitudes (positive outlook, effective communication)
- What factors enable/ facilitate you to admit to this room [KMC room] and start Kangaroo Mother Care (KMC) early within 24 hours after you gave birth at this hospital?
  - Medical factors (gestational age, birth weight, baby's health)
  - Maternal factors (health, willingness, readiness, postpartum health)
  - Healthcare system support (setting, resource constraints, …
  - Knowledge and education (awareness and counseling)
  - Psychological factors (stress, empowerment, encouragement)
  - Acceptance and beliefs (cultural, religious, alignment with beliefs and values)
  - Healthcare provider attitudes (positive outlook, effective communication)
- What do you think about the benefits of early KMC for premature and LBW babies?
- Have you noticed any positive effects of KMC on your child's health and well-being?

**Probe:** (Helps bond with baby, keeps baby warm, Helps with feeding, Others………

**The feeding:**

- Can you please describe to me about the feeding experience and feeding progress of your baby starting from birth until now?
  - How was the infant fed immediately after birth?
  - When did your baby receive the first feeding of breast milk after birth? What factors influenced the timing of your baby's first breast milk feeding?
  - Can you describe to me the feeding methods you have been using for your baby (breastfeeding, bottle feeding, tube feeding, ….)?
  - Apart from breast milk and medication, was your baby given any other substances for feeding? If yes, what were the reasons and timing for this?
  - Have you encountered challenges with exclusive breastfeeding in the KMC unit? How have you overcome these challenges?
  - Do you find that breastfeeding during KMC offers comfort and ease for you and your baby?
  - What information and counseling have you received to support exclusive breastfeeding in the KMC unit?
    - Were you shown how to position and attach your baby to the breast for feeding while practicing KMC?
  - From your perspective, what measures/steps should be taken to facilitate the successful initiation and continuation of exclusive breast milk feeding by parents?

**Support and Education:**

- Did you receive any form of information, education, support or guidance from healthcare providers or hospital staff regarding KMC initiation and continuation?
  - Did you feel adequately informed and prepared to practice KMC?

**Suggestions and Recommendations:**

- Based on your experiences, what suggestions or recommendations would you give in initiating and practicing early KMC?
  - Based on your experience, what advice or suggestions would you offer to other mothers who are considering practicing early KMC?
  - What changes or improvements could be made in healthcare facilities to better support and encourage mothers to initiate early KMC?

**Wrapping up:**

Are there any other issues I haven't brought up that you feel are important and you want to talk through?

**Tool II: In-depth interview with health care providers**

| **#** | **Item** | **Response options/ Codes** |
| --- | --- | --- |
|  | **Identifiers** |  |
| 1 | Participant ID |  |
| 2 | Interview date |  |
| 3 | Language of Interview |  |
| 4 | Zone |  |
| 5 | Woreda |  |
| 6 | Health facility name |  |
|  | **Background information** |  |
| 7 | What is your age in completed years? |  |
| 8 | Sex |  |
| 10 | What is your marital status? | 1. Single  2. Married/living together  3. Widowed  4. Separated  5. Other (specify) |
| 11 | What is your professional background? |  |
| 12 | What is your main role in this facility |  |
| 13 | How long have you worked in this facility |  |

**Build rapport:**

- To begin, I’d like to get to know you a little bit more. Tell me, what is it like for you being a health care worker?

**Effective KMC:**

- When/after how many hours/ is Kangaroo Mother Care (KMC) initiated for preterm/LBW infants at this hospital? Why/why not?
- When do you think a mother should begin Kangaroo Mother Care after giving birth? Why?
- What factors affect (**hinder**) the early initiation of Kangaroo Mother Care (KMC) within 24 hours after birth at this hospital?
  - **Probe**
    1. Medical factors (gestational age, birth weight, baby's health)
    2. Maternal factors (health, willingness, readiness, mother's postpartum health)
    3. Healthcare system support (setting, resource constraints, workload, trained staff, hospital policies)
    4. Knowledge and education (parents, providers, parental awareness and counseling)
    5. Psychological factors (parental stress, emotional support, family empowerment, encouragement)
    6. Place of delivery (home, hospital, health centers, and etc…)
    7. Social support (family, friends, peer groups)
    8. Acceptance and beliefs (cultural, religious, alignment with beliefs and values)
    9. Healthcare provider attitudes (positive outlook, effective communication)
- What factors affect (**facilitate**) the early initiation of Kangaroo Mother Care (KMC) within 24 hours after birth at this hospital?
  - **Probe**
    1. Medical factors (gestational age, birth weight, baby's health)
    2. Maternal factors (health, willingness, readiness, mother's postpartum health)
    3. Healthcare system support (setting, resource constraints, workload, trained staff, hospital policies)
    4. Knowledge and education (parents, providers, parental awareness and counseling)
    5. Psychological factors (parental stress, emotional support, family empowerment, encouragement)
    6. Place of delivery (home, hospital, health centers, and etc…)
    7. Social support (family, friends, peer groups)
    8. Acceptance and beliefs (cultural, religious, alignment with beliefs and values)
    9. Healthcare provider attitudes (positive outlook, effective communication)

**The feeding:**

- From your experiences, how do you describe the feeding of preterm/LBW infants at this hospital?
  - Time of initiation of breast milk feeding after birth? Mechanisms?
  - What factors affect the immediate initiation and continuation of exclusive breastfeeding for preterm and low birth weight infants after birth?
    - **Probe**
      - Infant Factors (Health and stability, Gestational age and birth weight, Feeding ability, Medical complications)
      - Maternal Factors (Maternal health and well-being, Willingness and confidence, Previous breastfeeding experience, Emotional state)
      - Healthcare Support and Setting (KMC Unit) (Necessary resources: (Breastfeeding education materials, Breast pumps, Informational posters and visual aids, Comfortable seating, Breastfeeding pillows) Availability of skilled staff, Guidance and counseling, Lactation support and education)
- Are there instances where LBW/preterm infants receive substances (butter, water, etc.) other than breast milk and medication? What prompts these decisions?
- From your perspective, what measures/steps should be taken to facilitate the successful initiation and continuation of exclusive breast milk feeding by parents?

**Support and Training and Future Improvements:**

- Have you ever received training on KMC/eKMC?

**Probe:** What kind of training, when, where, for how long and who give you trainings you received?

- Do you feel adequately prepared to guide parents through the process?
- Based on your insights, what strategies or interventions could be implemented to overcome the barriers and promote the practice of early KMC?

**Wrapping up:**

Are there any other issues I haven't brought up that you feel are important and you want to talk through?

## **Kangaroo Mother Care (KMC) Service Provision Observation Checklist (English version)**

Observation of overall KMC service provision to explore enablers and barriers to early initiation of KMC.

- ***Date of Observation:***
- ***Health Facility Name:***

**A. Pre-Initiation of KMC:**

**Assessment and Identification:**

- Are healthcare providers actively assessing infants for eligibility for KMC?
- Is there a protocol or guideline for identifying preterm or low birth weight infants suitable for KMC?

**Parent Education:**

- Are parents being educated about the benefits and process of KMC?
- Is information provided in a clear and understandable manner?

**Readiness of Parents:**

- Are parents willing and ready to initiate KMC?
- Are they comfortable with the idea of skin-to-skin contact?

**B. Initiation of KMC:**

**Timely Initiation:**

- Are preterm or low birth weight infants being initiated on KMC within the recommended timeframe after birth?

**Skin-to-Skin Contact:**

- Are parents practicing proper skin-to-skin contact with their infants?
- Is skin-to-skin contact maintained for an adequate duration?

**Support and Supervision:**

- Are healthcare providers available to assist parents during the initiation process?
- Do healthcare providers offer guidance on positioning and ensuring infant's safety?

**C. Enablers and Barriers:**

**Enablers of Effective KMC Initiation:**

- Availability of a separate space for KMC ward
- If there is an availability of space for KMC,
  - The size of the space…………and Numbers of beds…………………
  - KMC room well illuminated and comfortable for mother’s
- Are there clear protocols and guidelines for KMC initiation?
- Is there a supportive and encouraging attitude from healthcare providers?
- Are healthcare providers assisting and guiding parents in proper feeding techniques during KMC sessions?

**Barriers to Effective KMC Initiation:**

- Are there challenges in identifying eligible infants due to lack of resources or awareness?
- Are parents hesitant to initiate KMC due to cultural or other factors?
- Are there issues with healthcare staff workload impacting their ability to support KMC initiation?

**Communication and Counseling:**

- How effectively are healthcare providers communicating with parents about KMC?
- Is counseling provided to address concerns or misconceptions about KMC?

**D. Overall Quality of Care:**

- KMC Room sanitation? clean and hygienic? (Observe Hand washing (practice & setup), latrine, shower, cleanliness of the room)
- Are infection control measures being followed during KMC practice?
- Are parents comfortable during KMC sessions?
- Are they actively involved in the care of their infants?

**Documentation:**

- Is there a system in place to document KMC initiation and progress?
- Is there a clear feeding chart for babies practicing KMC?
- Is infant weight monitored and recorded regularly?

**E. Recommendations:**

**Areas for Improvement:**

- Based on the observation, what areas could be improved in the KMC service provision?

**Strengths and Best Practices:**

- What aspects of the KMC service provision are working well and could serve as best practices?

**F. Materials in KMC unit**

1. KMC leaflet available Y N
2. KMC eligibility criteria available Y N
3. List of danger signs available Y N
4. KMC follow up form available and updated Y N
5. Feeding chart available Y N
6. Weight monitoring chart available and recorded Y N
7. KMC admission register available Y N
8. Diaper available Y N
9. Socks available Y N
10. Cap available Y N
11. Pillow Y N
12. Mattress Y N
13. Bed sheet Y N
